# Supplementary material for: A Comparative Analysis of Symmetry Indices for Spatiotemporal Gait Features in Early Parkinson’s Disease
Source: MDPI journal article supplement (doi:10.3390/neurolint15030070), 2023-09-07
Supplement: s1 [file s1]

# Supplementary Material: A Comparative Analysis of Symmetry Indices for Spatiotemporal Gait Features in Early Parkinson's Disease

Erasmia Giannakou <sup>1</sup>, Styliani Fotiadou <sup>1,2</sup>, Vassilios Gourgoulis <sup>1</sup>, Georgios Mavrommatis <sup>3</sup> and Nikolaos Aggelousis<sup>1,\*</sup>

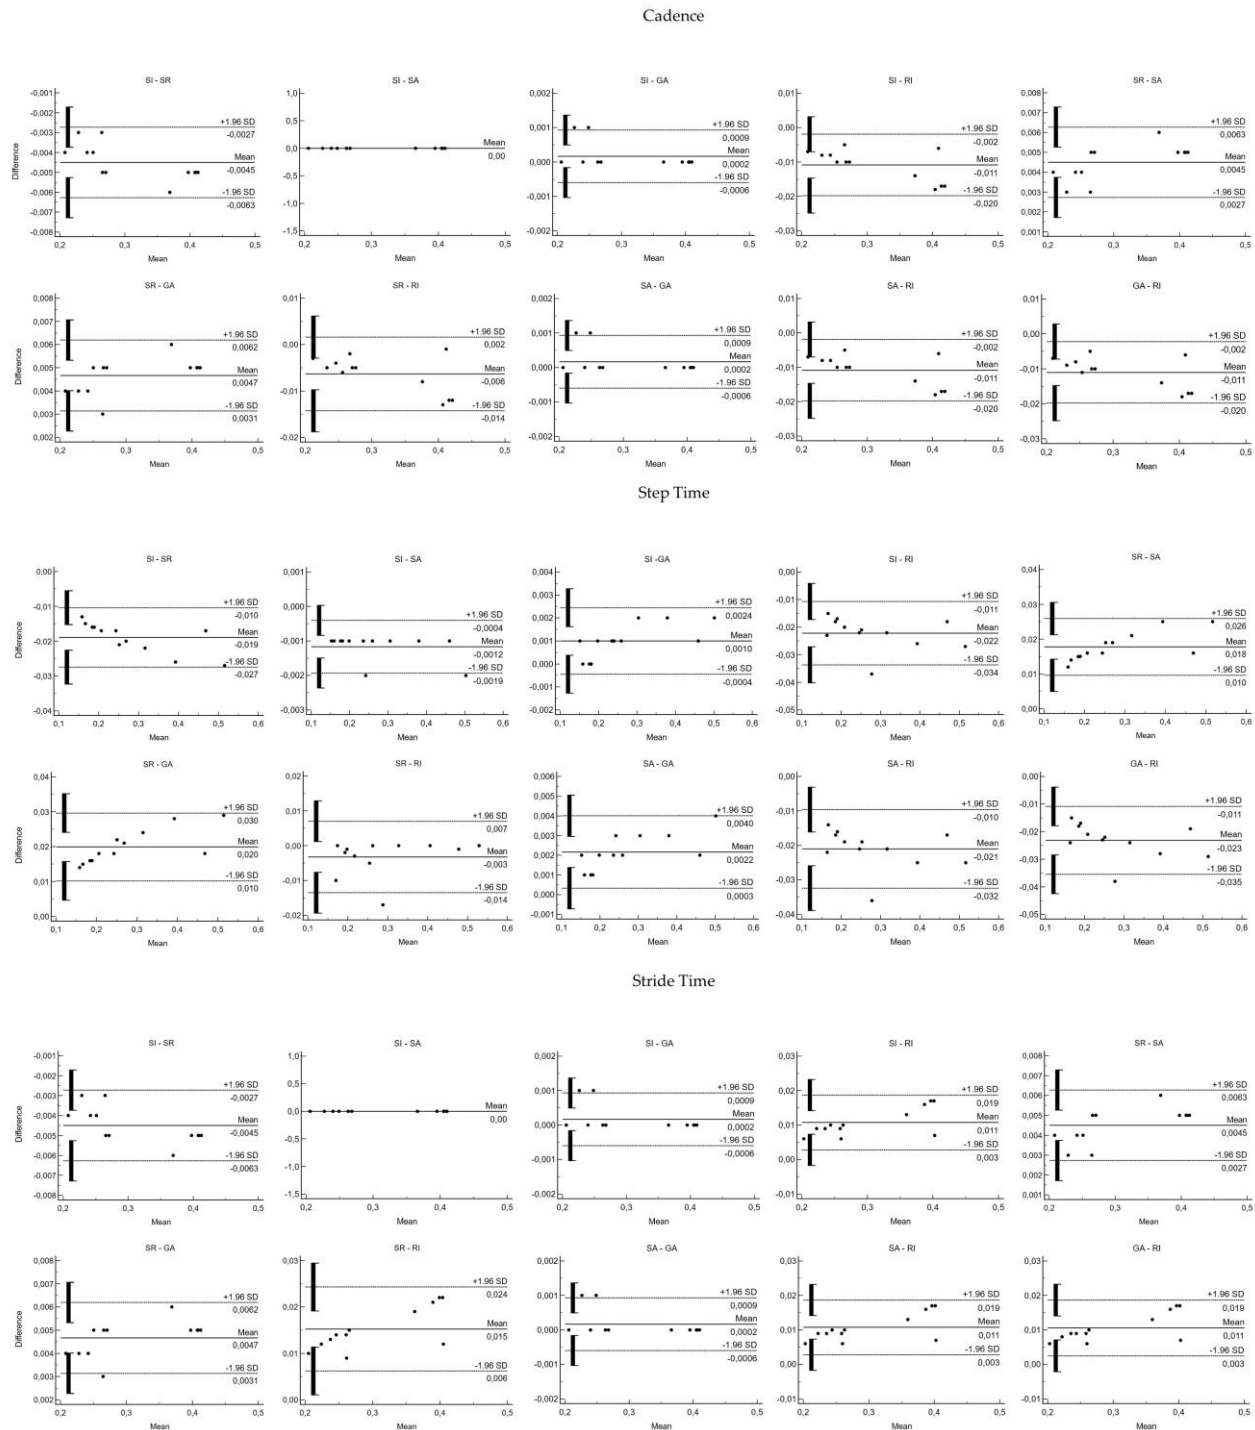

**Figure S1.** Bland-Altman plots of the relationship between mean and difference, mean difference (continuous line) and the approximate 95% confidence intervals (dashed line), of each symmetry

indices pair (SI-SR, SI-SA, SI-GA, SI-RI, SR-SA, SR-GA, SR-RI, SA-GA, SA-RI and GA-RI) for cadence, step time and stride time.

### Single Support

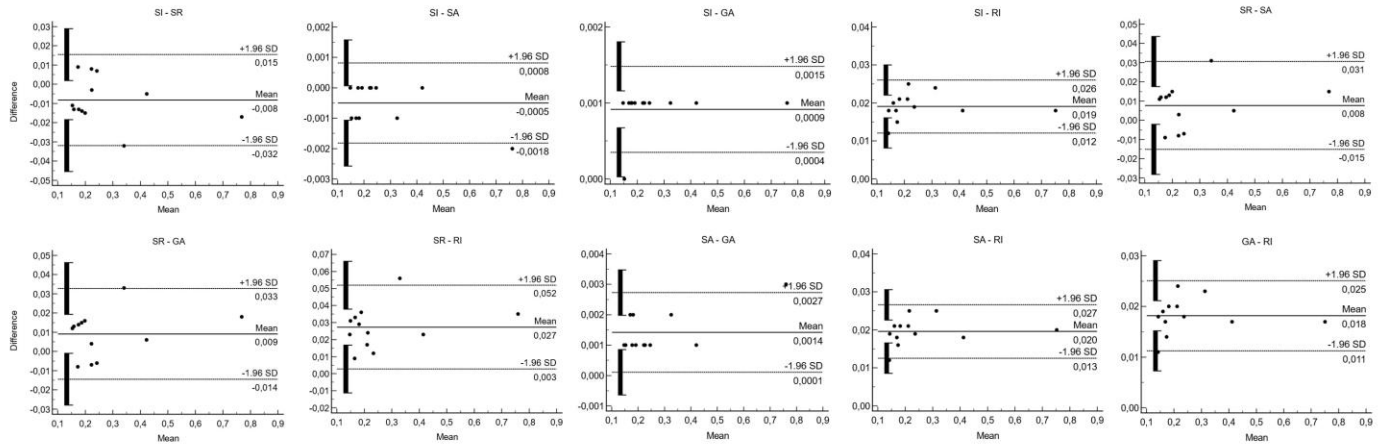

### Double Support

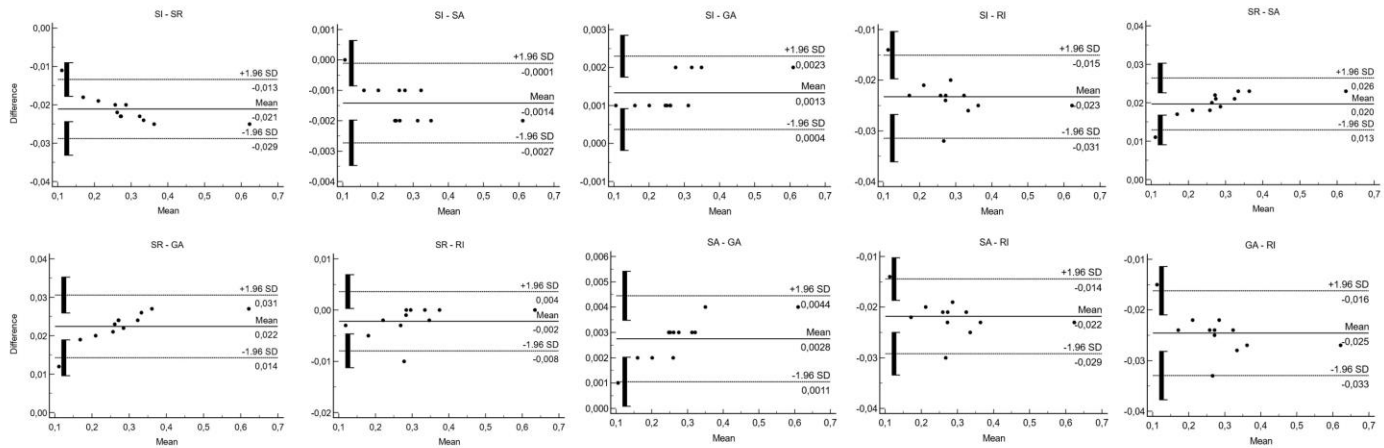

### Walking Speed

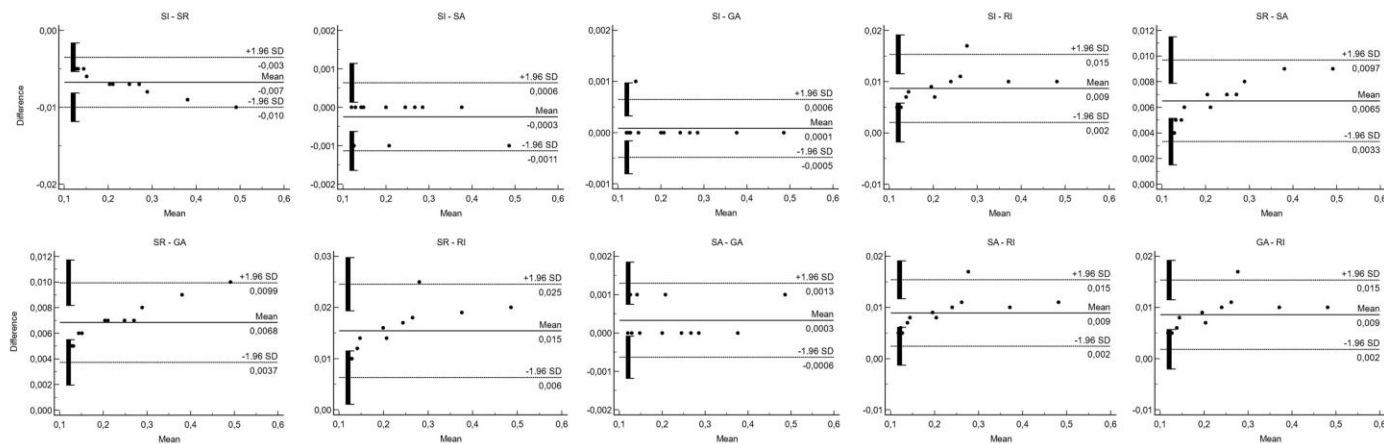

**Figure S2.** Bland-Altman plots of the relationship between mean and difference, mean difference (continuous line) and the approximate 95% confidence intervals (dashed line), of each symmetry indices pair (SI-SR, SI-SA, SI-GA, SI-RI, SR-SA, SR-GA, SR-RI, SA-GA, SA-RI and GA-RI) for single support, double support and walking speed.

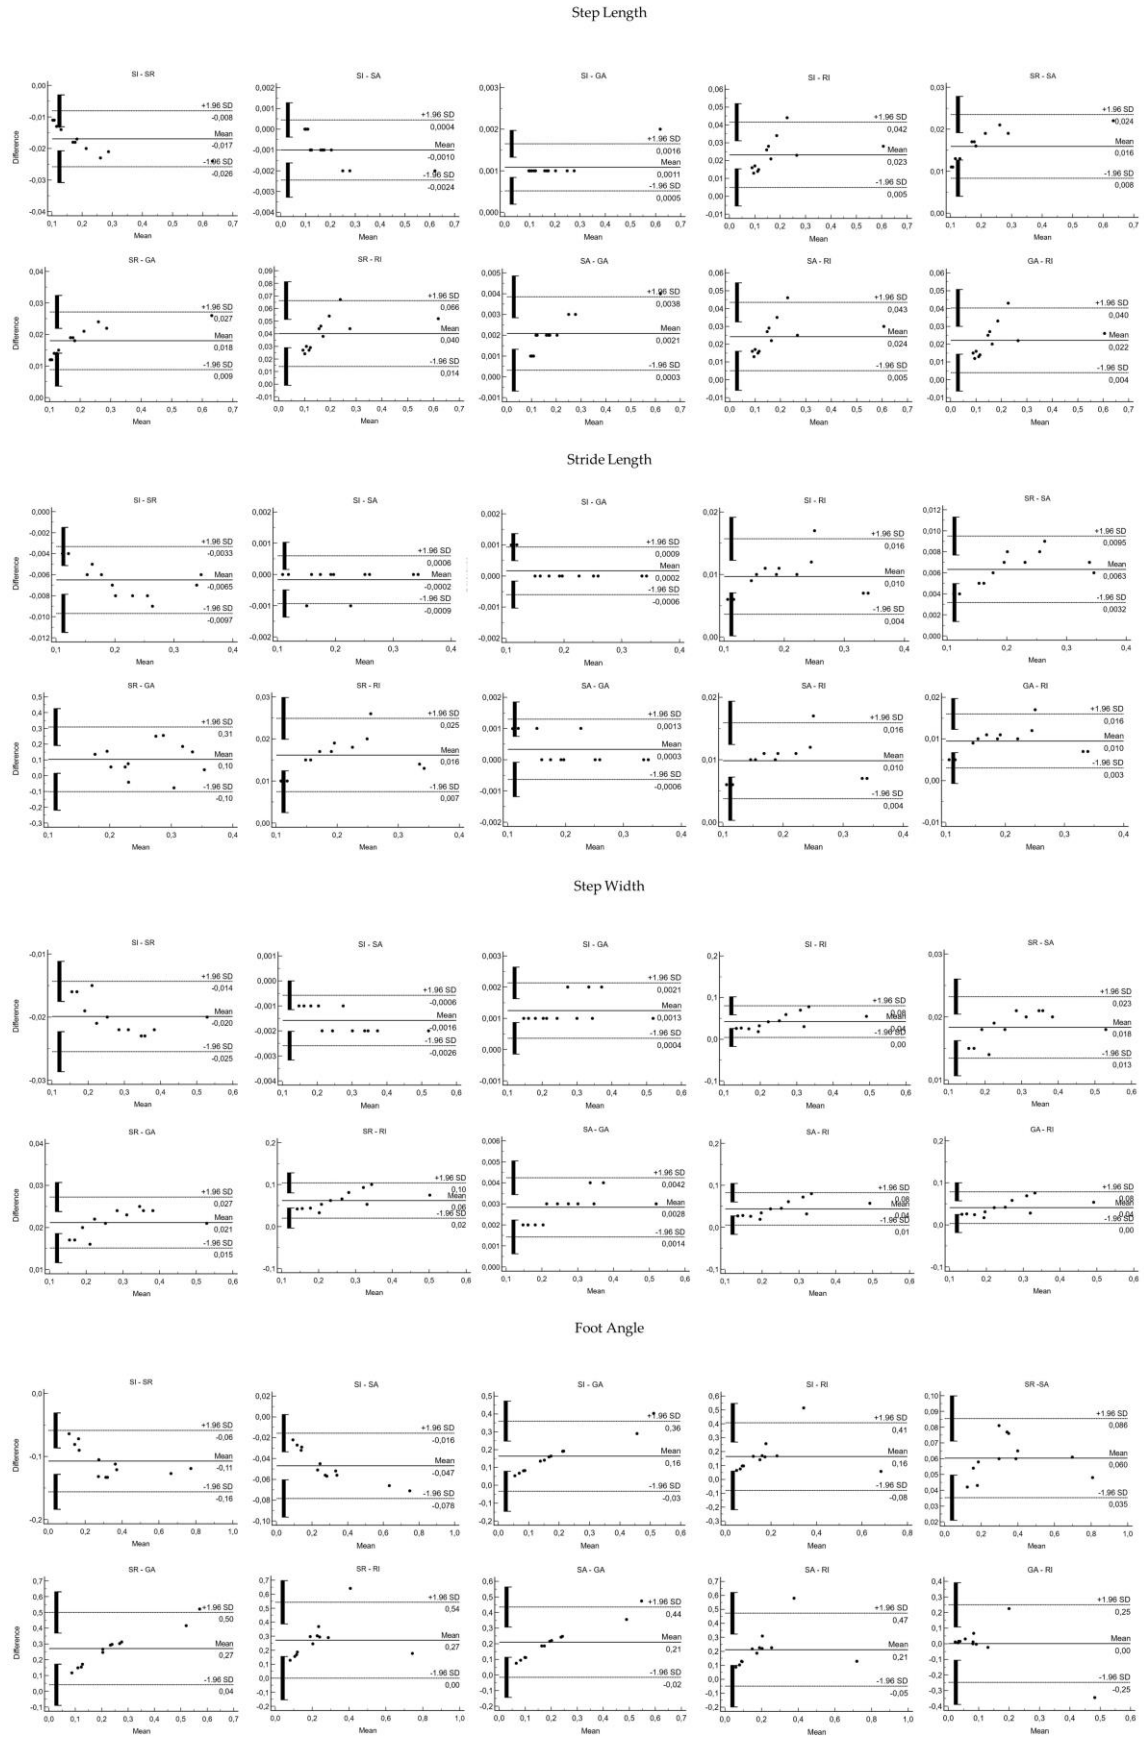

**Figure S3.** Bland-Altman plots of the relationship between mean and difference, mean difference (continuous line) and the approximate 95% confidence intervals (dashed line), of each symmetry indices pair (SI-SR, SI-SA, SI-GA, SI-RI, SR-SA, SR-GA, SR-RI, SA-GA, SA-RI and GA-RI) for step length, stride length, step width and foot angle.
